# Supplementary material
Source: ML conference proceedings conference paper supplement (https://proceedings.neurips.cc/paper_files/paper/2011/hash/160c88652d47d0be60bfbfed25111412-Abstract.html)
Supplement: Supplementary file [file 160c88652d47d0be60bfbfed25111412-Supplemental.zip]

## Supplementary Material

### 8 Proof of Lemma 1

The proof follows along the same lines of either of the two more general Lemmas proved below: Lemma 2 which considers the multiplicative approximation case, and Lemma 8 which considers the regularized case.

### 9 Proof of Lemma 2

$$\begin{aligned}
 \mathcal{L}(w_{t+1}) - \mathcal{L}(w^t) &= -\frac{1}{\kappa_1} |[\nabla \mathcal{L}(w^t)]_{j_t}|^2 \\
 &\leq -\frac{c}{\kappa_1} \|\nabla \mathcal{L}(w^t)\|_\infty^2 \\
 &\leq -\frac{c}{\kappa_1 \|w^0 - w^*\|_1^2} (\mathcal{L}(w^t) - \mathcal{L}(w^*))^2,
 \end{aligned} \tag{9}$$

where we used

$$\begin{aligned}
 \mathcal{L}(w^t) - \mathcal{L}(w^*) &\leq \langle \nabla \mathcal{L}(w^t), w^t - w^* \rangle \\
 &\leq \|\nabla \mathcal{L}(w^t)\|_\infty \cdot \|w^t - w^*\|_1.
 \end{aligned}$$

The recursion (9) then gives us the result.

### 10 Proof of Lemma 8

**Lemma 10.** The greedy coordinate descent iterates of Algorithm 2 satisfy:

$$\mathcal{L}(w^t) + \mathcal{R}(w^t) - \mathcal{L}(w^*) - \mathcal{R}(w^*) \leq \frac{\kappa_1}{2} \frac{\|w^0 - w^*\|_1^2}{t}.$$

*Proof.* As shorthand, we use  $w', w, j$  for  $w^{t+1}, w^t, j_t$ . Note that  $|\eta_j| = \|\eta\|_\infty$  by definition of  $j_t$ . Now,  $\eta_j$  satisfies  $g_j + \kappa_1 \eta_j + \rho_j = 0$ , for some  $\rho \in \partial R(w')$ . So,

$$\begin{aligned}
 R(w') - R(w) &= R_j(w'_j) - R_j(w_j) \\
 &\leq \langle \rho_j, \eta_j \rangle = -\langle g_j, \eta_j \rangle - \kappa_1 \eta_j^2.
 \end{aligned}$$

Using this, we have

$$\begin{aligned}
 \mathcal{L}(w') + R(w') &\leq \mathcal{L}(w) + g_j \eta_j + \frac{\kappa_1}{2} \eta_j^2 + R(w') \\
 &\leq \mathcal{L}(w) + R(w) - \frac{\kappa_1}{2} \eta_j^2 \\
 &= \mathcal{L}(w) + R(w) - \frac{\kappa_1}{2} \|\eta\|_\infty^2.
 \end{aligned} \tag{10}$$

Now let  $g' = \nabla \mathcal{L}(w')$  to get,

$$\begin{aligned}
 \mathcal{L}(w') - \mathcal{L}(w) &\leq \langle g', w' - w \rangle \\
 &= \langle g' - g, w' - w \rangle + \langle g, w' - w \rangle \\
 &\leq \eta_j^2 \kappa_1 + \langle g, w' - w \rangle,
 \end{aligned}$$

where the last inequality is because  $\|g' - g\| \leq \kappa_1 \|w' - w\|$  and  $\|w' - w\| = |\eta_j|$ . Combining this with the fact that  $\mathcal{L}(w) - \mathcal{L}(w^*) \leq \langle g, w - w^* \rangle$  gives,

$$\mathcal{L}(w') - \mathcal{L}(w^*) \leq \eta_j^2 \kappa_1 + \langle g, w' - w^* \rangle.$$

Adding to this the inequality,  $R(w') - R(w) \leq \langle \rho, w' - w^* \rangle$  gives

$$\begin{aligned}\epsilon' &:= \mathcal{L}(w') + R(w') - \mathcal{L}(w^*) - R(w^*) \\ &\leq \eta_j^2 \kappa_1 + \langle \rho + g, w' - w^* \rangle \\ &\leq \eta_j^2 \kappa_1 + \|\rho + g\|_\infty D \\ &= \|\eta\|_\infty^2 \kappa_1 + \kappa_1 \|\eta\|_\infty D ,\end{aligned}$$

where  $D := \|w^0 - w^*\|_1$ . Assuming that  $\eta_j \leq D$  (note that  $D = O(\sqrt{s})$  is at least lower-bounded by a constant, and the objective can reduce by such a large magnitude  $\eta_j > D$  at most finite number of times), we get the key inequality

$$\epsilon' \leq 2\kappa_1 \|\eta\|_\infty D .$$

Plugging this back in (10), we get the recurrence

$$\epsilon_{t+1} \leq \epsilon_t - \frac{(\epsilon_{t+1})^2}{8\kappa_1 D^2} .$$

This yields  $\epsilon_t \leq O(\kappa_1 D^2/t)$  as required.  $\square$

## 11 Proof of Lemma 3

*Proof.* Denote  $\bar{r} = r/\|r\|_2$ . Suppose  $\bar{x}_k$  is a  $(1 + \epsilon_{nn})$  multiplicative factor approximation to the greedy step  $\max_j \langle \bar{x}, \bar{r} \rangle$ . Then

$$\|\bar{x}_k - \bar{r}\|_2^2 \leq (1 + \epsilon_{nn}) \|\bar{x}_j - \bar{r}\|_2^2 ,$$

so that  $\langle \bar{x}_j, \bar{r} \rangle \leq \frac{\epsilon_{nn}}{(1 + \epsilon_{nn})} + \frac{1}{(1 + \epsilon_{nn})} \langle \bar{x}_k, \bar{r} \rangle$ .

Thus if  $\langle \bar{x}_k, \bar{r} \rangle > \epsilon$ , then

$$\begin{aligned}\langle \bar{x}_j, \bar{r} \rangle &\leq \frac{\epsilon_{nn}}{(1 + \epsilon_{nn})} \frac{\langle \bar{x}_k, \bar{r} \rangle}{\epsilon} + \frac{1}{(1 + \epsilon_{nn})} \langle \bar{x}_k, \bar{r} \rangle \\ &= \frac{\epsilon_{nn}(1/\epsilon) + 1}{(1 + \epsilon_{nn})} \langle \bar{x}_k, \bar{r} \rangle ,\end{aligned}$$

which completes the proof.  $\square$
